1 **Conflict detection in a sequential decision task is associated with increased**  
2 **cortico-subthalamic coherence and prolonged subthalamic oscillatory**  
3 **response in the beta band**

4 **Author List:**

5 Zita Eva Patai<sup>1,2</sup>, Tom Foltynie<sup>3</sup>, Patricia Limousin<sup>3</sup>, Harith Akram<sup>3</sup>, Ludvic Zrinzo<sup>3</sup>,  
6 Rafal Bogacz<sup>2\*</sup>, Vladimir Litvak<sup>1\*</sup>

7 <sup>1</sup>Wellcome Centre for Human Neuroimaging, UCL Queen Square Institute of  
8 Neurology, London, UK, <sup>2</sup>MRC Brain Network Dynamics Unit, Oxford University,  
9 Oxford UK, <sup>3</sup>Functional Neurosurgery Unit, The National Hospital for Neurology and  
10 Neurosurgery and Department of Clinical and Movement Neurosciences, UCL Queen  
11 Square Institute of Neurology, London, UK

12 \*Equal contribution

13 **Abstract**

14 Making accurate decisions often involves the integration of current and past evidence.  
15 Here we examine the neural correlates of conflict and evidence integration during  
16 sequential decision making. Patients implanted with deep-brain stimulation (DBS)  
17 electrodes and age-matched healthy controls performed an expanded judgement task,  
18 in which they were free to choose how many cues to sample. Behaviourally, we found  
19 that while patients sampled numerically more cues, they were less able to integrate  
20 evidence and showed suboptimal performance. Using recordings of  
21 Magnetoencephalography (MEG) and local field potentials (LFP, in patients) in the  
22 subthalamic nucleus (STN), we found that beta oscillations signalled conflict between  
23 cues within a sequence. Following cues that differed from previous cues, beta power  
24 in the STN and cortex first decreased and then increased. Importantly, the conflict  
25 signal in the STN outlasted the cortical one, carrying over to the next cue in the  
26 sequence. Furthermore, after a conflict, there was an increase in coherence between  
27 the dorsal premotor cortex and subthalamic nucleus in the beta band. These results  
28 extend our understanding of cortico-subcortical dynamics of conflict processing, and  
29 do so in a context where evidence must be accumulated in discrete steps, much like  
30 in real life. Thus, the present work leads to a more nuanced picture of conflict  
31 monitoring systems in the brain and potential changes due to disease.

## 32 **Introduction**

33 Whether it is deciding which method of transportation to take to get to work most  
34 efficiently or which horse to bet on to maximize monetary gain, humans are constantly  
35 integrating noisy evidence from their environment and past experience, in order to  
36 optimize their decisions. Often the information comes at intervals, thus necessitating  
37 a system that can track incoming signals over time and only commit to making a choice  
38 after sufficient evidence has been integrated (Ratcliff, 1978; Busemeyer and  
39 Townsend, 1993; Usher and McClelland, 2001), a process that has been proposed to  
40 rely on the cortico-basal-ganglia circuit (Bogacz et al., 2010). Research in human  
41 patients with implanted electrodes for clinical deep-brain stimulation (DBS) treatment  
42 has pointed to the role of the subthalamic nucleus (STN) of the basal ganglia as a  
43 decision gate-keeper. The STN is postulated to set the decision threshold in the face  
44 of conflicting information by postponing action initiation until the conflict is resolved  
45 (Frank, 2006). As predicted by the model, STN activity is increased for high conflict  
46 trials and STN-DBS affects decision making in the face of conflicting evidence (Frank  
47 et al., 2007; Coulthard et al., 2012; Green et al., 2013). Furthermore, the decision  
48 threshold correlated specifically with changes in STN theta oscillatory power  
49 (Cavanagh et al., 2011; Herz et al., 2016). Thus, oscillatory activity, primarily in the  
50 theta and beta bands, in the basal ganglia, reflects immediate inhibition to motor output  
51 during situations involving conflict (Frank, 2006), whether it is the response, sensory  
52 or cognitive uncertainty (Bonnevie and Zaghoul, 2019).

53 The majority of previous studies in the STN employed paradigms in which the putative  
54 processes of conflict detection and setting of decision threshold happened in close  
55 temporal proximity. For example, in previously used paradigms such as the flanker  
56 task (Zavala et al., 2015), go-no-go (Alegre et al., 2013; Benis et al., 2014), and Stroop  
57 task (Brittain et al., 2012) evidence was presented simultaneously. Although STN  
58 activity was also studied in random dot motion paradigm that required evidence  
59 accumulation over time (Herz et al., 2018), it was unknown exactly what sensory  
60 evidence was presented when, on individual trials, due to the noisy nature of stimuli.  
61 As a result, previous studies do not allow us to fully disentangle the neural correlates  
62 of ongoing evidence accumulation and conflict during decision making. In particular, it  
63 is not clear what kind of conflicting information during evidence accumulation the STN  
64 responds to: does it respond to a local conflict, when a new piece of information does

65 not match single previous piece in the sequence, or global conflict, when a new piece  
66 of information does not match overall evidence from the entire trial?

67 An important role in shaping the STN activity is played by the interaction between the  
68 cortical circuits and the STN. However, the nature and cortical locus of this interaction  
69 has only been examined in a handful of studies. Resting-state coherence between the  
70 STN and ipsilateral frontal cortex has shown a peak in the beta band in human patients  
71 (Litvak, Jha, et al., 2011; West et al., 2020) as well as rodent models of Parkinson's  
72 disease (Magill et al., 2004; West et al., 2018). Additionally, coherence in the theta  
73 band from frontal sites (as measured with electroencephalography) to the STN  
74 increased during a conflict detection task (Zavala et al., 2014, 2016).

75 To precisely characterize how the neural activity in cortex and the STN changes during  
76 the process of evidence accumulation, we recorded STN local field potential (STN-  
77 LFP) simultaneously with whole-head magnetoencephalography (MEG) while  
78 Parkinson's disease patients performed an expanded judgement task (Leimbach et  
79 al., 2018). Here, cues are presented at discrete intervals, and evidence for the correct  
80 answer develops as the participant samples and integrates multiple cues over the  
81 course of the trial (Figure 1). This paradigm allowed us to investigate how behavioural  
82 and neural responses depend on the continual unfolding of evidence extended in time,  
83 determine what kind of conflicting information the STN responds to, and test  
84 predictions of computational models.

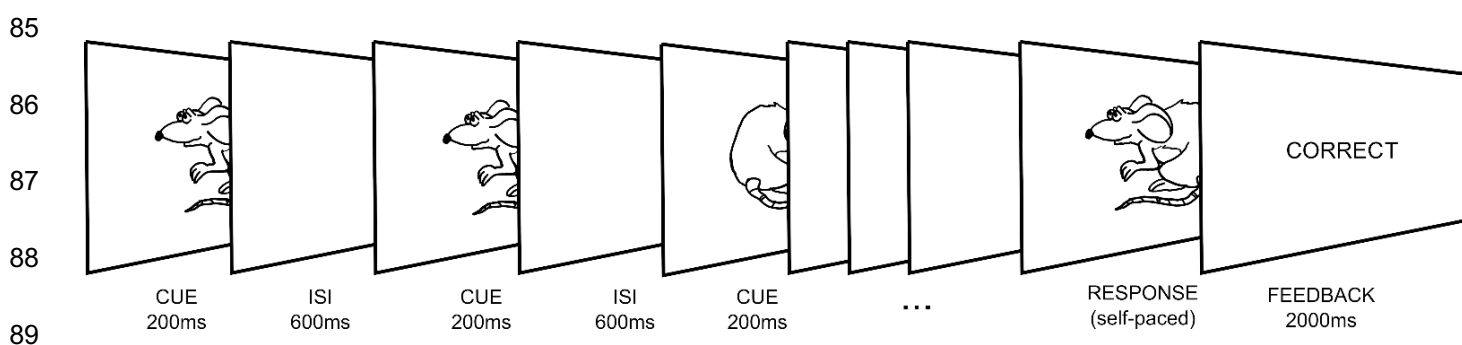

90 **Figure 1: Expanded Judgement Task.** Participants performed a version of an  
91 evidence integration task, with two key elements: 1. the cues were presented  
92 sequentially within the trial rather than simultaneously, which allowed us to examine  
93 evidence accumulation over time, and 2. the trial duration, i.e. number of cues  
94 sampled, was up to the participants, who responded when they felt they had received

95 enough information to make a decision. Participants were required to guess the likely  
96 direction (left or right) the mouse 'would run' in. Each cue was 70% valid, i.e. they  
97 represented the correct direction 70% of the time if they were to be treated in isolation.

98

## 99 **Materials and Methods**

### 100 *Participants*

101 We tested 15 patients with a clinical diagnosis of Parkinson's disease (14 male, mean  
102 age: 59, range 47-71, two left-handers), following electrode implantation for DBS  
103 treatment, before full closure of the scalp, thus allowing for intracranial recordings of  
104 the STN (all bilateral recordings, except 1 patient right unilateral and 1 patient with 3  
105 contacts in the left STN and only 2 on the right, this patient was also subsequently  
106 diagnosed with Multiple Systems Atrophy). Among tested patients, 11 had Medtronic  
107 3389 electrodes, while 4 had Boston Vercise™ directional leads. The surgical  
108 procedures are described in detail in (Foltynie et al., 2011). All patients were assessed  
109 on medication (mean Levodopa Equivalent Dosage 1272mg, range: 500-1727.5mg).  
110 Unified Parkinson's Disease Rating Scale (UPDRS) part 3 scores were 39.6±14  
111 (mean±standard deviation, range: 18-61) when OFF medication, and 15.4±6.5 (range:  
112 7-30) when ON medication. None of the patients had cognitive impairment (Mini-  
113 Mental State Examination (MMSE) scores: mean 28.8, range: 26-30, one patient score  
114 missing), clinical depression, or apathy. Two patients were excluded from the analysis  
115 due to poor performance of the task (see *Task* below). We recruited 13 age and gender  
116 matched controls (12 male, mean age: 57, range 44-70, two left-handers). The patient  
117 study was approved by the UK National Research Ethics Service Committee for South  
118 Central Oxford and the control study was covered by University College London Ethics  
119 Committee approval for minimum risk magnetoencephalography studies of healthy  
120 human cognition. All participants gave written informed consent. Patients did not  
121 receive financial compensation and the controls were compensated for their time  
122 according to our centre's standard hourly rate.

### 123 *Surgical Procedure*

124 Bilateral DBS implantation was performed under general anaesthesia using a  
125 stereotactic (Leksell frame G, Elekta) MRI-guided and MRI-verified approach without

126 microelectrode recording as detailed in previous publications (Holl et al., 2010;  
127 Foltynie et al., 2011). Two stereotactic, preimplantation scans were acquired, as part  
128 of the surgical procedure, to guide lead implantation; a T2-weighted axial scan  
129 (partial brain coverage around the STN) with voxel size of  $1.0 \times 1.0 \text{ mm}^2$  (slice  
130 thickness=2 mm) and a T1-weighted 3D-MPRAGE scan with a  $(1.5 \text{ mm})^3$  voxel size  
131 on a 1.5T Siemens Espree interventional MRI scanner. Three dimensional distortion  
132 correction was carried out using the scanner's built-in module. Target for the deepest  
133 contact was selected at the level of maximal rubral diameter (~5 mm below the AC-  
134 PC line). To maximise DBS trace within the STN, the target was often chosen 1.5 - 2  
135 mm posterolateral to that described by Bejjani (Bejjani et al., 2000). Stereotactic  
136 imaging was repeated following lead implantation to confirm placement.

### 137 *Task*

138 To investigate the neural basis of evidence accumulation over time, we used the  
139 expanded judgement task (Figure 1, similar to the task previously used by Leimbach  
140 et al, 2018). Participants were shown a series of images of a mouse facing either left  
141 or right. Cues were presented for 200ms, with an inter-stimulus interval (ISI) of 600ms,  
142 so there was 800ms interval from one onset to another, to which we refer as Stimulus  
143 Onset Asynchrony (SOA). Participants were required to judge in which direction the  
144 mouse will 'run', based on the probabilities extracted from a series of sequential cue  
145 images, and then respond accordingly. The validity of the cues was 70%, such that  
146 each cue (left or right mouse) represented the correct choice 70% of the time. The two  
147 directions were equally likely across trials, thus the chance level in the task was 50%.  
148 If the participants responded based on one of the cues only, without accumulating  
149 information over time, then their expected success rate would be 70%. Responses  
150 were made by pressing a button with the thumb of the congruent hand after a self-  
151 chosen number of cues, when the participant felt they had enough evidence to make  
152 a decision. Prior to the recording, the participants underwent a short training session  
153 where they were first asked to respond only after seeing a set number of stimuli  
154 (between two and ten) and then told that for the main experiment they will decide  
155 themselves how many stimuli to observe. This was to ensure that participants chose  
156 to respond based on accumulating evidence from a sequence of images rather than  
157 just the first stimulus. Participants performed up to 200 trials (Patients:  $168 \pm 11$ ;  
158 Controls: 200 each, except one control who completed 150 trials). Two patients were

159 excluded from the analysis due to poor performance of the task (accuracy at chance  
160 level).

### 161 *Recording and Analysis*

162 Participants performed the task while seated in a whole-head MEG system (CTF-VSM  
163 275-channel scanner, Coquitlam, Canada). For patients, STN-LFP,  
164 electrooculography (EOG) and electromyography (EMG) recordings were also  
165 obtained using a battery-powered and optically isolated EEG amplifier (BrainAmp MR,  
166 Brain Products GmbH, Gilching, Germany). STN-LFP signals were recorded  
167 referenced to a common cephalic reference (right mastoid).

168 All preprocessing was performed in SPM12 (v. 7771, <http://www.fil.ion.ucl.ac.uk/spm/>,  
169 (Litvak et al., 2011b)), and spectral analysis and statistical tests were performed in  
170 Fieldtrip (<http://www.ru.nl/neuroimaging/fieldtrip/> (Oostenveld et al., 2011)) using the  
171 version included in SPM12.

172 STN-LFP recordings were converted offline to a bipolar montage between adjacent  
173 contacts (three bipolar channels per hemisphere; 01, 12, and 23) to limit the effects of  
174 volume conduction from distant sources (for more details see Litvak et al., 2010 and  
175 Oswal et al., 2016b). Four of the patients had segmented DBS leads (Vercise™ DBS  
176 directional lead, Boston Scientific, Marlborough, USA). In these cases, we averaged  
177 offline the signals from the 3 segments of each ring and treated them as a single ring  
178 contact. Thus, for each participant, we had a total of 3 STN EEG channels in each  
179 hemisphere (except for 2 participants: one with right side electrodes only, thus 3  
180 channels, and one with 1 contact on the right excluded due to extensive noise, thus 5  
181 channels). The LFP data were downsampled to 300Hz and high-pass filtered at 1Hz  
182 (Butterworth 5<sup>th</sup> order, zero phase filter).

183 A possibly problematic but unavoidable feature of our task was that the stimuli were  
184 presented at relatively short SOA not allowing for the power to return to baseline  
185 before the next stimulus was presented. Furthermore, the SOA was fixed making  
186 entrainment and anticipation possible. These were deliberate design choices to  
187 make the task easier for this very difficult patient population prone to attentional  
188 difficulties, and to be able to collect a large number of trials for model-based  
189 analyses. Any jittering of the SOAs (which would have to go in the direction of  
190 increasing their duration) would have led to far fewer trials being collected. The total

191 duration of the recording had to be kept short as the patients were unable to tolerate  
192 extended periods of testing. Furthermore, having a very long SOA would make it  
193 more likely that the participants would resort to explicit counting, which was  
194 something we aimed to avoid.

195

196 To account for these design issues, we developed an unconventional way of  
197 performing time-frequency analysis on these data in the absence of a baseline. We  
198 first ran time frequency analysis on continuous LFP data (multitaper method  
199 (Thomson, 1982) 400ms sliding window, in steps of 50ms) on *a priori* defined beta  
200 power (13-30 Hz average = 21.5Hz; note that when looking at individual participant  
201 beta power around the response period, we found a similar band as defined *a priori*:  
202 individual mean range: 16.6-28.4Hz; overall min: 11Hz, max: 31Hz). Separately we  
203 also estimated the power in the theta band (2-8Hz average = 5Hz, e.g. Herz et al.,  
204 2016). The resulting power time series were log-transformed and high-pass filtered at  
205 0.5 Hz (Butterworth 5<sup>th</sup> order, zero phase filter) to remove fluctuations in power that  
206 were slower than our SOA. Afterwards, the power time series were epoched around  
207 the presentation of each cue stimulus (-500 to 800ms). We averaged power across  
208 contacts within each hemisphere, resulting in 1 left and 1 right STN channel, and we  
209 also calculated the mean STN signal by combining hemispheres. We used a  
210 permutation cluster-based non-parametric test to correct for multiple comparisons  
211 across time (the duration of the whole cue epoch (0-800ms) and report effects that  
212 survive correction only ( $p < 0.05$  family-wise error (FWE) corrected at the cluster level).

213 Similarly to LFP, MEG data were downsampled to 300Hz, and high-pass filtered at  
214 1Hz (Butterworth 5th order, zero phase filter). For sensor-level analysis, we used  
215 only the control group data, as in the patients the sensor signals were contaminated  
216 by ferromagnetic wire artefacts (Litvak et al., 2010).

217 For the MEG sensor-level time-frequency analysis, we used all channels and a  
218 frequency range of 1-45Hz. All other analyses were identical to the LFP pipeline  
219 reported above. However, we corrected for multiple comparisons across all MEG  
220 channels, timepoints (0-800ms) and frequencies (1-45Hz), and only report effects that  
221 survived that correction ( $p < 0.05$  FWE corrected at the cluster level).

222 For source-level analysis, the continuous MEG data were projected to source space  
223 with Linearly Constrained Maximum Variance (LCMV) beamformer (Veen et al., 1997)  
224 using a 10-fold reduced version of the SPM canonical cortical mesh (Mattout et al.,  
225 2007) as the source space (resulting in 818 vertices and the same number of source  
226 channels). The source orientation was set in the direction of maximum power. See  
227 Litvak et al., (2012) for details on beamforming and Litvak et al. (2010) for details on  
228 issues regarding beamformer use for removing artefacts from simultaneous MEG and  
229 intracranial recordings. Next, time-frequency analysis was performed on continuous  
230 source data the same way as for STN-LFP except the frequencies of interest were  
231 informed by the sensor-level analysis. This biased the statistical test for discovery of  
232 an effect (cf. double dipping, Kriegeskorte, Simmons, Bellgowan, & Baker, 2009) but  
233 our aim in this analysis was post-hoc interrogation of the effects established at the  
234 sensor level in terms of their location in the cortex rather than hypothesis testing  
235 (Gross et al., 2012). To limit our search space for the coherence analysis (below), we  
236 only investigated sources that survived  $p < 0.05$  FWE correction.

237 Time-resolved coherence was then computed between the identified cortical sources  
238 and STN contacts by going back to raw source time series. The data were epoched  
239 (-1000 to 1000ms to increase the window for analysis), and time-frequency analysis  
240 was performed as described above with coherence between the sources and the left  
241 and right STN also computed from the cross-spectrum. Non-parametric permutation  
242 testing between conditions was corrected for multiple comparisons across channels  
243 (source vertices), time (0-1600ms to cover both cue 'i' and cue 'i+1') and frequencies  
244 (1-30Hz), and we only report effects that survive correction ( $p < 0.05$  FWE corrected at  
245 the cluster level).

#### 246 *Reconstruction of electrode locations*

247 We used the Lead-DBS toolbox (<http://www.lead-dbs.org/> (Horn and Kühn, 2015)) to  
248 reconstruct the contact locations. Post-operative T2 and T1 images were co-registered  
249 to pre-operative T1 scan using linear registration in SPM12 (Friston et al., 2007). Pre-  
250 (and post-) operative acquisitions were spatially normalized into  
251 MNI\_ICBM\_2009b\_NLIN\_ASYM space based on preoperative T1 using the Unified  
252 Segmentation Approach as implemented in SPM12 (Ashburner and Friston, 2005).  
253 DBS electrode localizations were corrected for brain shift in postoperative acquisitions



254 by applying a refined affine transform calculated between pre- and post-operative  
255 acquisitions that was restricted to a subcortical area of interest as implemented in the  
256 brain shift correction module of Lead-DBS software. The electrodes were then  
257 manually localized based on post-operative acquisitions using a tool in Lead-DBS  
258 specifically designed for this task. The resulting locations were verified by an expert  
259 neurosurgeon.

## 260 *Choice Strategy*

261 In order to analyse the strategy used by the participants during choice, we investigated  
262 which factors influence commitment to a choice on a given trial. We considered two  
263 factors: The first of them is the evidence integrated for the chosen option. Such  
264 accumulated evidence was computed from Equation 1 that continuously updates the  
265 evidence (decision variable,  $DV$ ) for a choice at time  $t$  based on the existing  $DV$  from  
266 the previous stimuli and the new incoming stimulus  $S_t$ , where  $S_t = -1$  for the left  
267 stimulus, and  $S_t = 1$  for the right stimulus. At the start of each trial, the decision  
268 variable was initialized to  $DV_0 = 0$ .

$$269 \quad DV_t = DV_{t-1} + S_t \quad (1)$$

270 The second factor we considered was whether the stimulus was the same as the  
271 previously presented one, i.e.  $SA_t = 1$  if  $S_t = S_{t-1}$  and  $SA_t = 0$  otherwise. For all  
272 stimuli excluding the first stimulus on each trial (for which it is not possible to define  
273  $SA_t$ ) we performed a logistic regression predicting if the choice has been made after  
274 this stimulus, i.e. we tried to predict a variable  $D_t = 1$  if choice made after stimulus  $t$   
275 and  $D_t = 0$  otherwise. For each participant, we looked at the significance of the two  
276 factors.

## 277 *Estimating accumulated evidence using computational models*

278 In order to analyse if STN activity reflects the amount of available evidence for each  
279 response based on the stimuli presented so far, we employed computational models  
280 that can estimate this quantity at each point in time. We compared how well different  
281 models of evidence accumulation could capture the behaviour of different patients,  
282 and then generated regressors for each patient based on the best model for that  
283 patient. In addition to the model assuming evidence is integrated according to

284 Equation 1, we also considered three extended models which included a forgetting  
285 term ( $\lambda$ ), a bonus term ( $\omega$ ), or both (Equations 2-4).

$$286 \quad DV_t = (1 - \lambda)DV_{t-1} + S_t \quad (2)$$

$$287 \quad DV_t = DV_{t-1} + (1 + \omega SA_t)S_t \quad (3)$$

$$288 \quad DV_t = (1 - \lambda)DV_{t-1} + (1 + \omega SA_t)S_t \quad (4)$$

289 The forgetting term was used to model the decay of memory over the course of the  
290 trial and the bonus term is a weighting of ‘same’ pairs, i.e. the stimuli which match the  
291 directly preceding one (e.g.: in a ‘left-left-right’ sequence the second left stimulus  
292 would be weighted extra as it is the same as the first one).

293 To estimate the parameters ( $\lambda, \omega$ ), we assumed that the ratio of making a right  
294 choice to making a left choice is related to decision variable according to:

295

$$296 \quad \log \frac{P(right)}{P(left)} = \beta_0 + \beta_t DV_t$$

297 For each participant, we looked for parameters that maximized the likelihood of  
298 participant’s behaviour after all stimuli shown to that participant.

299 We found the winning model (based on Bayesian information criterion) to be variable  
300 across participants (number of participants in patients/control group indicated): M1 =  
301 1/0; M2 = 0/0; M3 = 4/1; M4 = 8/8, although the model that included both forgetting  
302 and bonus terms was the most common. The value of  $|DV_t|$  from the best model for a  
303 given patient was used as a regressor in Figure 5A.

#### 304 *Estimating Bayesian normalization term*

305 We investigated if the STN activity follows a pattern predicted by a computational  
306 model of the basal ganglia (Bogacz et al., 2007; Bogacz and Larsen, 2011). This model  
307 suggests that the basal ganglia compute the reward probabilities for selecting different  
308 actions according to Bayesian decision theory. These probabilities are updated after  
309 each stimulus and the updated information is fed back to the cortex via the thalamus.  
310 An action is initiated when the expected reward under a particular action exceeds a  
311 certain threshold. The model attributes a very specific function to the STN: ensuring

312 that if the probability of one action goes up, the probabilities of the others go down at  
313 the same time by normalising all probabilities so that they add up to one.

314 In order to create regressors for neural activity recorded from the STN, we used the  
315 original proposal that the STN computes the normalization term of the Bayesian  
316 equation during the evidence integration process (Bogacz & Gurney, 2007). We  
317 defined 2 cortical integrators  $Y_L$  and  $Y_R$ , which integrate evidence for the left and right  
318 stimulus respectively, as described above. Additionally, we subtracted the STN  
319 normalization term from the cortical integrators after each stimulus input in a sequence  
320 (Bogacz et al., 2016). For each participant, we assumed the integration follows one of  
321 the models described by Equations 1-4, which best describes given participants (see  
322 previous subsection). So, for example, for participants best described by Equation 1,  
323 the integrators were updated as follows

$$324 \quad Y_{L,t} = Y_{L,t-1} + L_t - STN_{t-1} \quad (5)$$

$$325 \quad Y_{R,t} = Y_{R,t-1} + R_t - STN_{t-1} \quad (6)$$

$$326 \quad STN_t = \log(\exp Y_{L,t} + \exp Y_{R,t}) \quad (7)$$

327 In the above equations,  $L_t = 1$ ,  $R_t = 0$  if cue  $t$  is left, and  $L_t = 0$ ,  $R_t = 1$ , otherwise.  
328 However, for models 2-4 we added decay to the cortical integrators and bonus terms  
329 to Equations 5-6 analogously to Equation 2-4, i.e. we ensured that  $DV_t = Y_{R,t} - Y_{L,t}$ . At  
330 the start of each trial, the integrators were initialized to  $Y_{L,0} = Y_{R,0} = \log 0.5$   
331 (corresponding to equal prior probabilities of the two responses). The value computed  
332 from Equation 7 was used as Bayesian normalization regressor in Figure 5.

333

## 334 **Results**

### 335 *Patients are able to accumulate evidence over time*

336 Patients waited on average 6.6 stimuli before making a response ( $6.59 \pm 0.52$  sem)  
337 and their accuracy was significantly above the 70% level expected if they only based  
338 their decision on a single cue ( $80 \pm 0.03$  sem,  $t=3.6$ ,  $p=0.004$ ). Controls waited on  
339 average 6.3 stimuli before making a response ( $6.29 \pm 0.46$  sem) and were similarly  
340 above 70% in their accuracy ( $88.6 \pm 0.01$  sem,  $t=18.4$ ,  $p<0.001$ ). There was no  
341 significant difference between groups in the number of stimuli viewed before making

342 a choice ( $t=0.42$ ,  $p$ -value = 0.68), but patients had lower accuracy ( $t=-2.99$ ,  
343  $p=0.0009$ ) and slower reaction time (as measured from the onset of the last cue  
344 before a response was made,  $t=2.16$ ,  $p=0.041$ ). See Table 1 for summary of  
345 behavioural measures.

346 To explore potential strategies participants could have used in the task, we  
347 compared performance in both groups to an agent that would have been an optimal  
348 observer, and would choose to respond left if the number of left cues was higher  
349 than the number of right cues, to respond right for a larger number of right cues, and  
350 would choose randomly if the numbers were equal. In other words, for each  
351 participant, we calculated the accuracy they would have achieved had they  
352 integrated evidence optimally, having seen the stimuli sampled by the participant on  
353 each trial. We found that controls and patients had significantly lower accuracy  
354 (controls:  $p=0.019$ , patients:  $p=0.0076$ ) than an ideal observer would have, based on  
355 the same cue sampling (89% for controls and 87% for patients).

356 Next, we asked whether participants were just solving the task by responding after  
357 they spotted two of the same stimuli in a row (i.e. after the first 'same' pair). To  
358 address this question, we investigated to what extent participants' response after  
359 stimulus was predicted by accumulated evidence, and by same stimuli in a row (see  
360 Materials and Methods for details). Most participants had responses best predicted  
361 either by accumulated evidence alone (6 patients and 6 controls), or by both  
362 accumulated evidence and stimulus repetition (5 patients and 7 controls). For  
363 remaining 2 patients none of these factors was predicting their response. Hence,  
364 there was no participant who exclusively relied of making a choice after seeing the  
365 'same' stimulus, without considering evidence integrated so far.

366

367

368

369

370

371

372 **Table 1:** Behavioural results showing mean and standard deviations for each group.  
373 RT: Reaction time; ACC: accuracy. The analytical probability of a 'same' pair at the end  
374 of the sequence would be 58% if participants chose the moment of response randomly. Both  
375 patients and controls responded significantly more often after a 'same' pair (both groups  
376  $p < 0.001$ ).

|               | # stimuli seen | Accuracy | RT(ms) | Fraction of responses after 'same' at end |
|---------------|----------------|----------|--------|-------------------------------------------|
| PATIENTS Mean | 6.59           | 0.80     | 536.52 | 0.73                                      |
| PATIENTS SD   | 1.88           | 0.10     | 29.48  | 0.11                                      |
| CONTROLS Mean | 6.29           | 0.89     | 502.74 | 0.81                                      |
| CONTROLS SD   | 1.65           | 0.04     | 48.81  | 0.09                                      |

377

378 *STN beta power shows persistent activity to local conflict during evidence*  
379 *accumulation*

380 In order to investigate how the STN represents the inconsistencies when faced with  
381 conflicting evidence, we separated all cues into two categories: 'same' or 'different' to  
382 the one immediately before it (we term this 'cue i', Figure 2A). In our analyses of neural  
383 responses to cues, we excluded the first cues in a sequence, because it is not possible  
384 to classify them as 'same' or 'different', and last cues seen as they overlapped with  
385 the response period. Thus, if a participant experienced this sequence of mouse  
386 images: 'left-right-left-left-right', the analysed conditions would be 'different-different-  
387 same'.

388 We found that beta oscillations responded to local conflict, generating a significant  
389 difference between 'same' and 'different' cues (cue 'i' in Figure 2B left panel) starting  
390 around 100ms after cue onset. Beta also showed a significant difference in the  
391 subsequent cue (i+1), with 'different' cues showing an increase in beta power, thus  
392 conflicting information on cue i results in increased beta power on cue i+1 (see Figure  
393 2C), a pattern of activity that is consistent with response inhibition (significant time  
394 clusters: 100-450ms, 750-1100ms, 1300-1600ms). These effects were greatly  
395 reduced in the theta band, with an effect of condition only briefly detectable during cue  
396 'i+1' (Figure 2B-C, right panel).

397 We did not find a relationship between behaviour on the task and these neural effects.

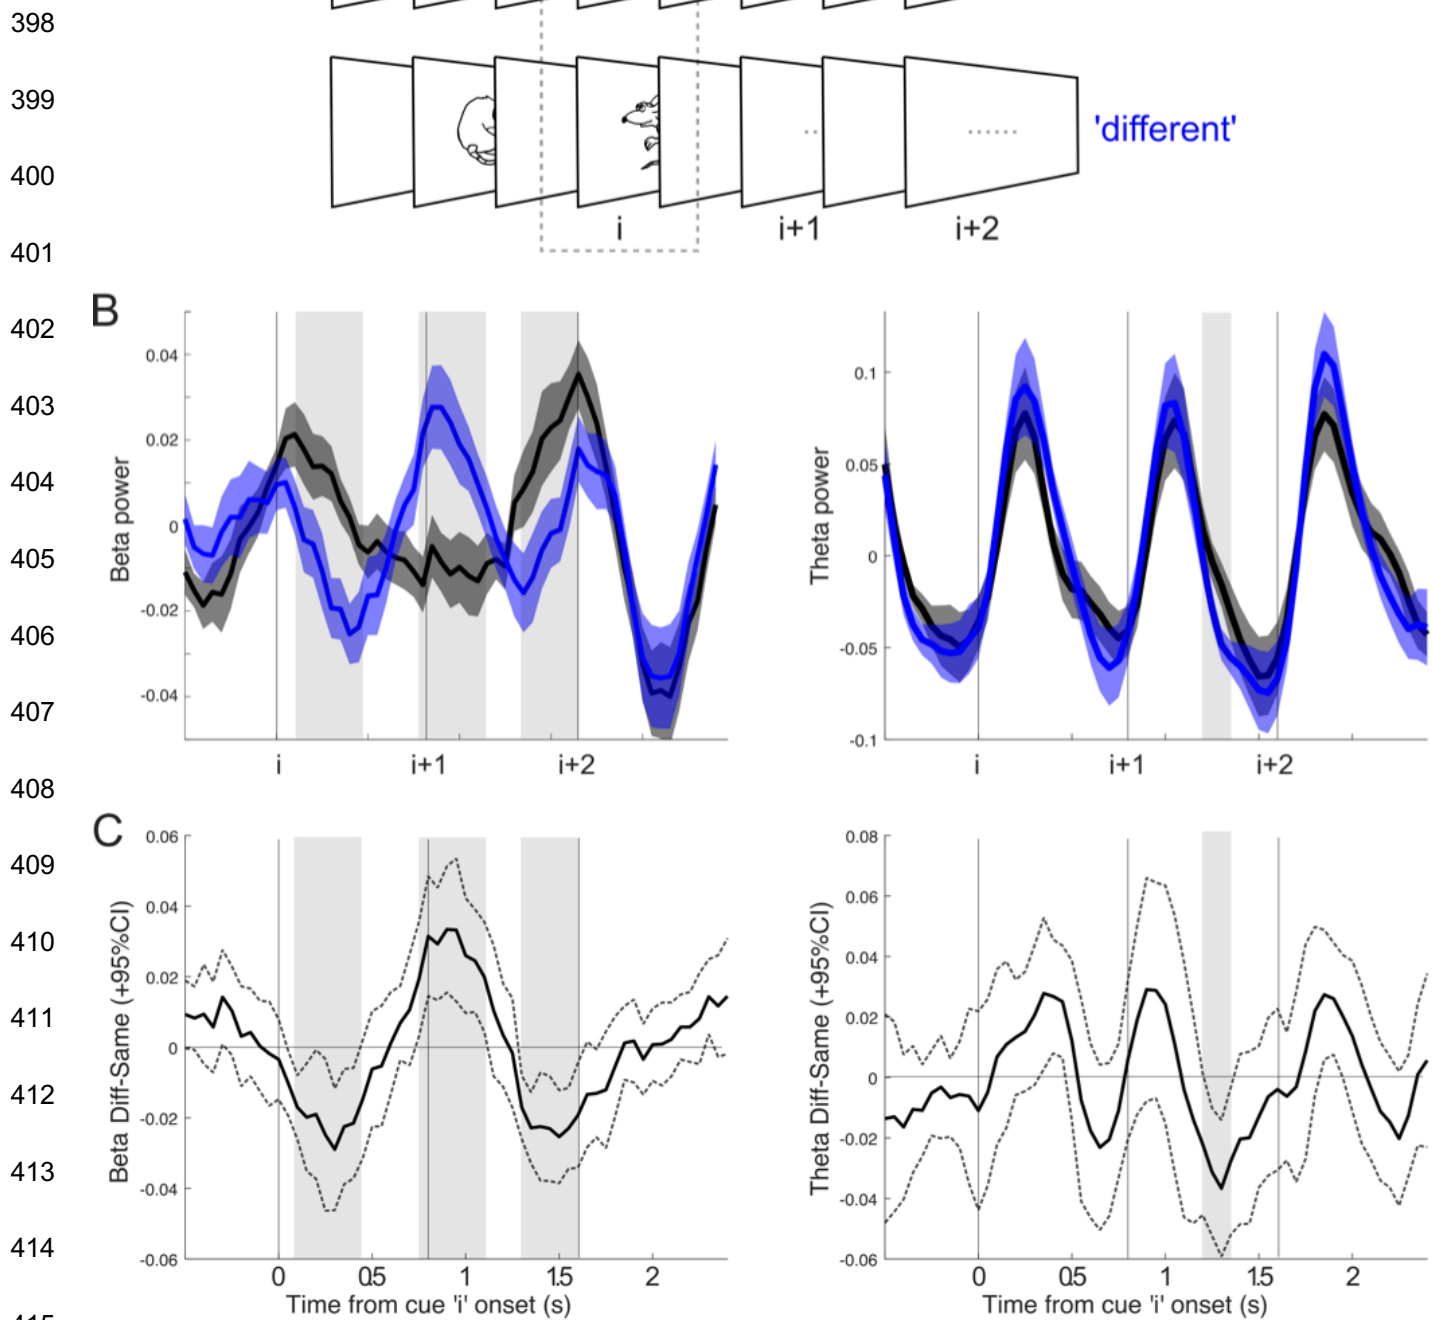

**Figure 2: Beta signalled local conflict, and carried this effect over to the next cue in a sequence. A)** Notation used in the paper. Let us consider an arbitrary cue  $i$  in a sequence, where  $i > 1$ : If cue  $i-1$  is the same as cue  $i$ , then we would call this the 'same' condition, and 'different' otherwise. We also plot the subsequent cues ( $i+1$ ,  $i+2$ ) for carry-over effects, but these are collapsed across cue type, left or right. **(B)** Left panel: Beta carried information locally as well as over to the next cue, with increased beta power for the 'different' condition. Right panel: Theta only carried mismatch information at the next cue in the sequence. Significant time periods are highlighted with shaded grey bars. Vertical lines show onset of cues in the sequence. The shaded

425 error bars show standard error of the mean. **C)** Difference waves of conditions  
426 ('different' minus 'same') with 95% confidence intervals shown by the dotted lines.  
427 After an initial dip there is a clear increase in beta power following the conflicting cue  
428 (i) starting just before the onset of cue  $i+1$ . Significant time periods are highlighted with  
429 shaded grey bars copied from panel B for comparison. Note that the apparent onset  
430 of the effect before zero is due to limited time resolution of the time-frequency  
431 decomposition.

432

### 433 *Cortical activity reflects rapid but non-persistent local conflict detection*

434 We investigated sensor-level MEG signals from controls in response to local conflict  
435 detection within the sequence. As with the STN, widespread activity over central  
436 sensors was found to signal local conflict – with an initial dip followed by an increase  
437 in beta power on 'different' trials (Figure 3A). The dip and increase in beta power were  
438 associated with different clusters of electrodes. The first cluster showed a significant  
439 decrease to different cues in the beta band across central, and predominantly right  
440 occipital, parietal and temporal sensors (inset in Figure 3A, 0-450ms, 8-35Hz,  
441  $p=0.002$ , Cohen's  $d=1.22$ );). A subsequent second cluster, more restricted to central  
442 sensors, showed an increase in beta power to different cues (550-800ms, 9-25Hz,  $p=$   
443  $0.008$ , Cohen's  $d=1.35$ ).

444 Interestingly, the time-course of the cortical effect was quicker than that of the STN  
445 (Figure 3B vs 2B), with conflicting information only lasting until the onset of the next  
446 cue in the sequence.

447

448

449

450

451

452

453

# Controls Different > Same

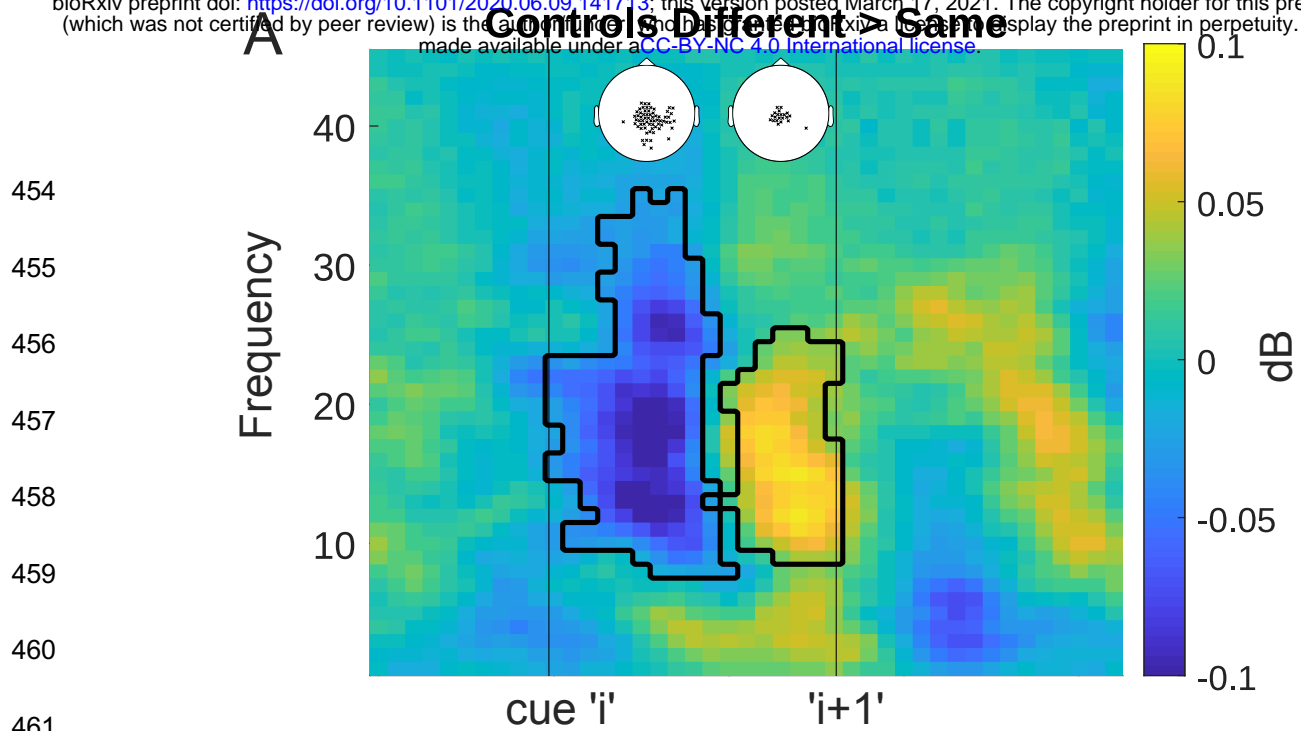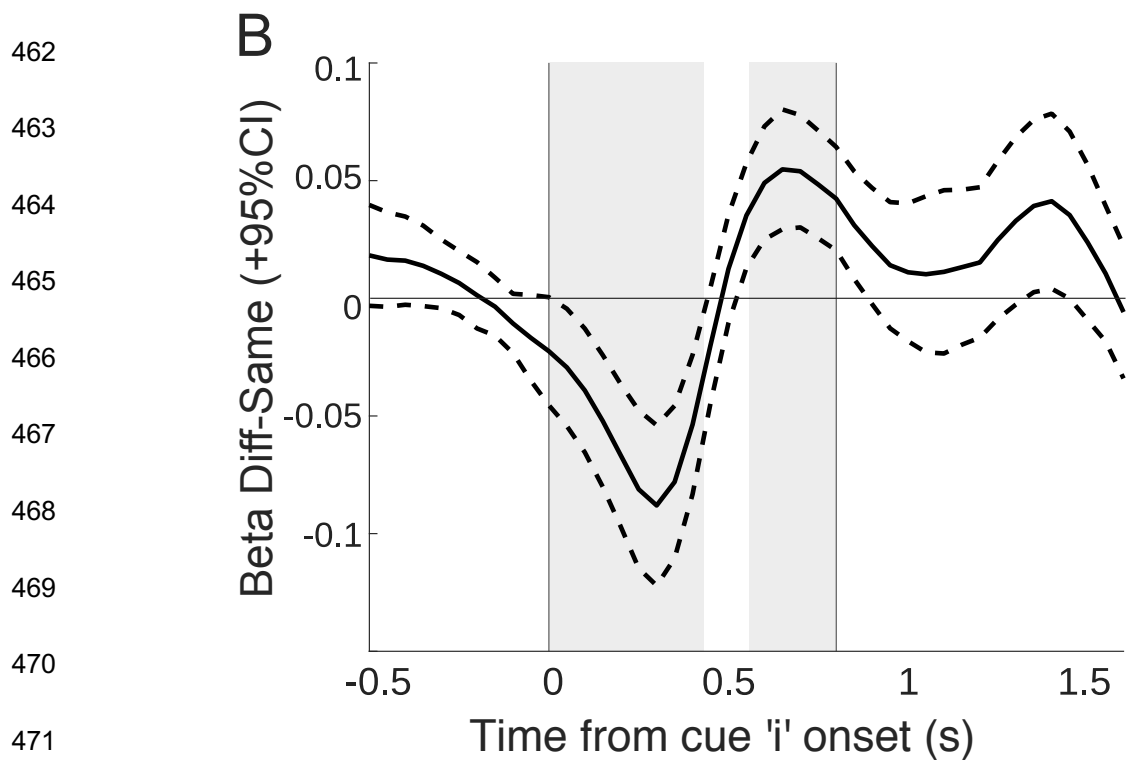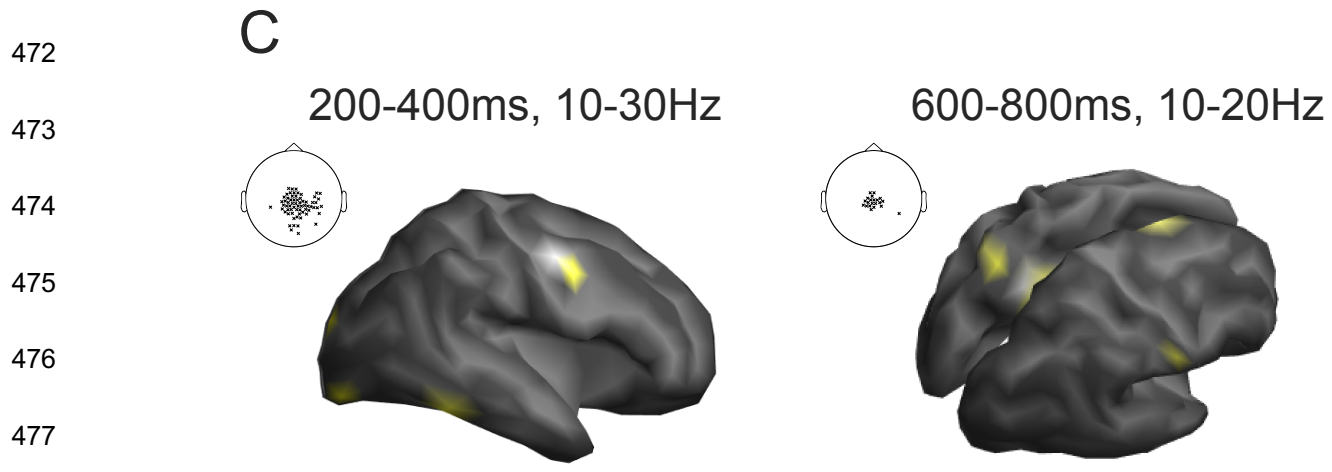



478 **Figure 3: Cortical activity to local conflict parallels STN but peaks earlier on**  
479 **average and has a shorter time course. A)** Time-frequency plot showing significant  
480 times and frequencies when contrasting ‘different’ vs ‘same’ cues, averaged over all  
481 significant sensors. Significant sensors are shown as an inset, separately for the 2  
482 clusters (cluster 1: 0-450ms, 8-35Hz; cluster 2: 550-800ms, 9-25Hz,). **B)** Difference  
483 wave for the beta effects over clusters (13-30Hz) band, as represented in Figure 2B.  
484 The dotted lines indicate 95% confidence intervals. **C)** Left: Source localization in a  
485 combined sample of patients and controls revealed the source of cluster 1 in three  
486 right-lateralized areas: occipital pole, ventral temporal cortex and lateral premotor  
487 cortex (BA6). Right: Cluster 2 showed left lateralized superior parietal lobe (BA7), left  
488 posterior cingulate cortex (BA23), right primary sensory cortex and right dorsal  
489 premotor cortex/pre-supplementary motor area (dPM/BA6).

490 *Coherence is increased between STN and frontal cortex during local conflict*

491 We used beamforming in a combined sample of patients and controls to localize the  
492 source of the ‘same-different’ effect (cluster 1: averaged over: 200-400ms [to  
493 exclude the time the stimulus was displayed on the screen], 10-30Hz; cluster 2:  
494 averaged over 600-800ms, 10-20Hz). In cluster 1 we found 3 right-hemisphere  
495 lateralized peaks (Figure 3C): occipital pole (2 peaks: MNI 19, -98, -14; 35, -89, -16),  
496 ventral temporal cortex (2 peaks: MNI 59, -53, -21; 52, -51, -21) and lateral premotor  
497 cortex (BA6, 2 peaks: MNI 52, -7, 44; 51, 3, 40). Cluster 2 was localized to left  
498 superior parietal lobe (SPL/BA7, MNI -23, -61, 52), left posterior cingulate cortex  
499 (PCC/BA23, MNI -14, -47, 31), right dorsal premotor area (dorsal/medial BA6, MNI 7,  
500 2, 69) and right primary somatosensory cortex (BA1, MNI 61, -18, 31). Note, at an  
501 uncorrected threshold ( $p < 0.001$ ) we also found the lateral premotor cortex, occipital  
502 pole and temporal cortex as in cluster 1, which is expected given the overlapping  
503 topography of sensors in the two clusters.

504 Next, we measured in patients the coherence between these cortical vertices and both  
505 the left and right STN-LFPs, separately. The coherence spectra were averaged over  
506 adjacent vertices resulting in three cortical sources for cluster 1 and four sources for  
507 cluster 2. We found a significant increase in coherence between the right dorsal  
508 premotor cortex and the right STN (510-900ms, 10-13Hz,  $p = 0.03$ , Cohen’s  $d = 1.71$ ;  
509 900-1240ms, 18-24Hz,  $p = 0.01$ , Cohen’s  $d = 1.44$ ; see Figure 4), suggesting that

510 ipsilateral cortical-subthalamic coherence is increased in the face of local conflict in  
511 the right hemisphere. Furthermore, it seems there are two separate points of  
512 coherence over the course of the cue, one after the onset of the conflict cue and one  
513 that extends into the processing of the next cue in the sequence, this latter effect is in  
514 the mid-high beta band, possibly reflecting response inhibition. No other sources, nor  
515 the left STN showed any significant effects. For completeness based on previous  
516 reports, we also investigated coherence with the inferior frontal gyrus (which was  
517 present as a source in patients at an uncorrected threshold), and found that it did not  
518 show any significant coherence with the STN.

519

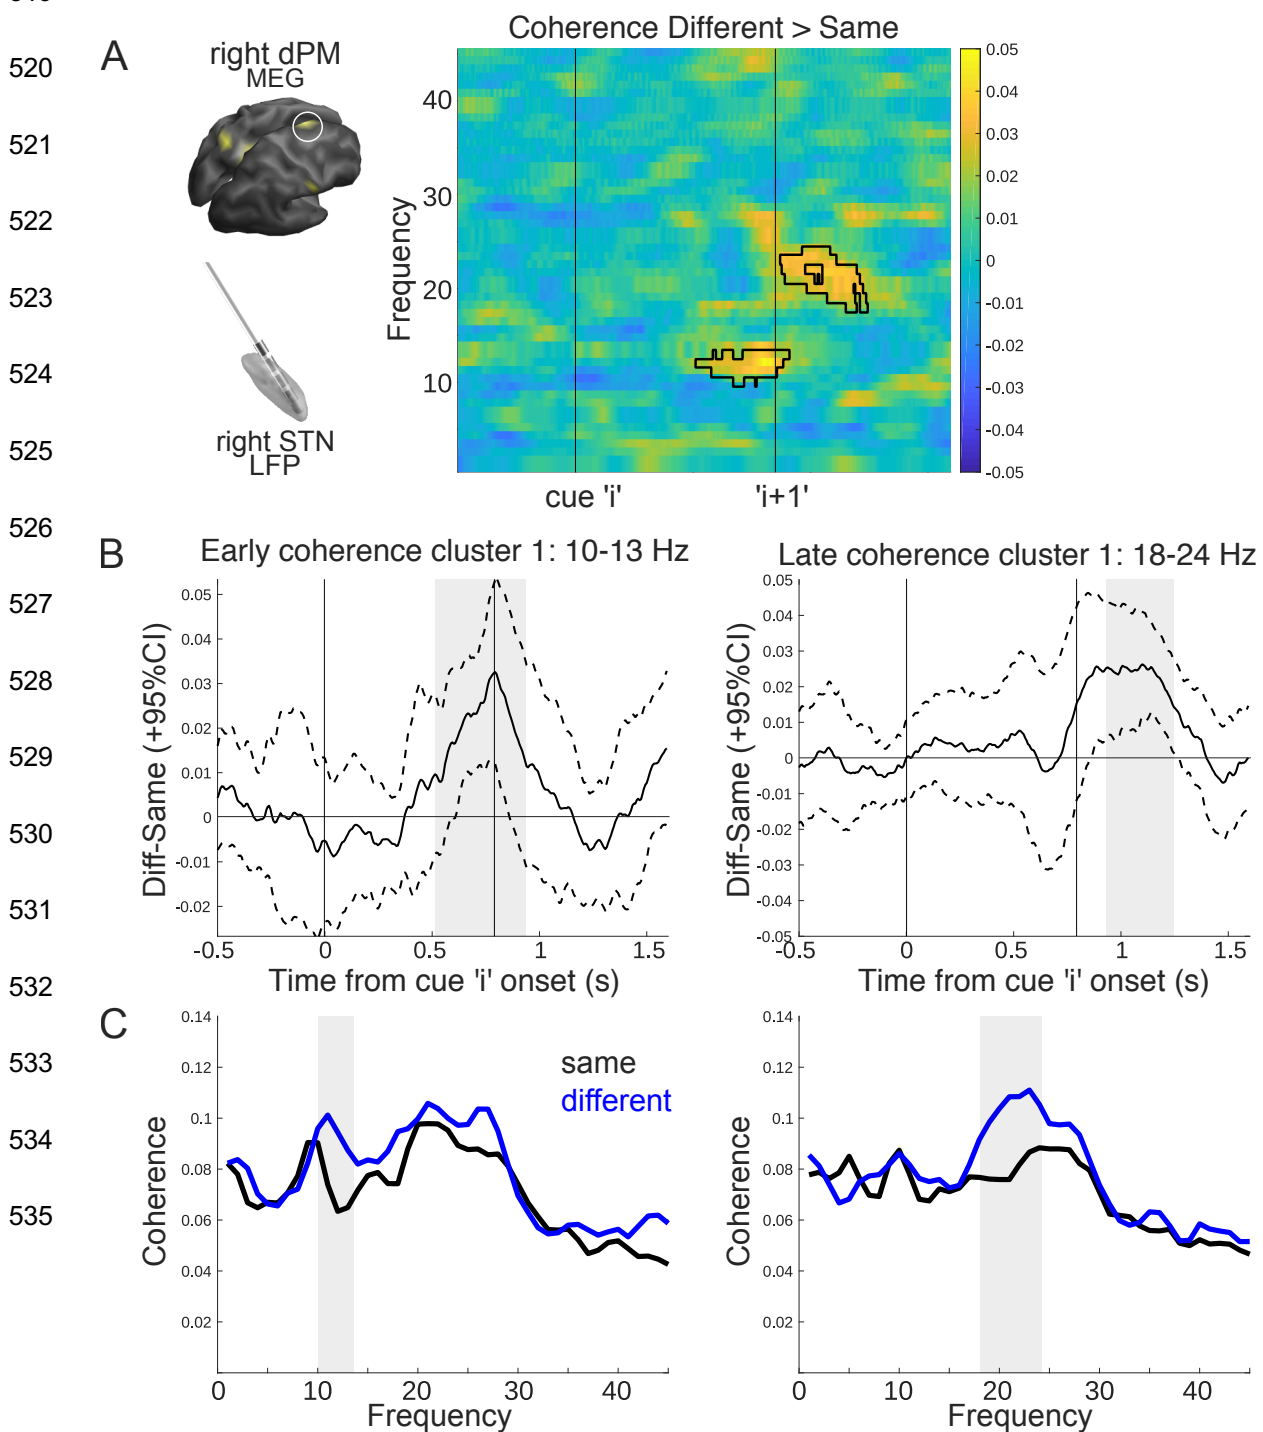

536 **Figure 4: Increased coherence between right frontal cortex and right STN during**  
537 **local conflict. A)** Time-frequency plot of coherence between the right STN and the  
538 right dorsal premotor cortex (visualized on the left). Two coherent clusters emerged,  
539 with an alpha/low beta coherence increase after ‘different’ cues, and a later increase  
540 in beta coherence carrying over into the next cue in the sequence. Significant clusters  
541 are shown in black outline. Inset on top left shows the source of the cortical effect for  
542 reference. **B)** Time-courses of coherence for both alpha/low and high beta plotted as  
543 a difference wave between conditions. The dotted lines indicate 95% confidence  
544 intervals. Significant timepoints are highlighted in grey. **C)** Frequency spectra of ‘same’  
545 (black) and ‘different’ (blue) trials during the significant time period from A. Grey area  
546 highlights significant frequencies: 10-13, 18-24 Hz.

#### 547 *Other variables related to decision making*

548 In addition to local conflict, we analyzed whether other variables occurring in  
549 theoretical models of decision making were reflected in neural activity. First, we  
550 explored if STN represents the normalization term in Bayes theorem as proposed in  
551 a previously suggested computational model (Bogacz et al., 2007). This model  
552 predicts that the activity in the STN is proportional to a logarithm of the normalization  
553 term in Bayes theorem  $\ln P(\text{cue } i)$ . This probability is computed on the basis of all  
554 previous cues  $\{\text{cue } 1, \dots, \text{cue } i-1\}$  so it expresses how expected the current cue is  
555 given all cues seen before. The negative of this regressor,  $-\ln P(\text{cue } i)$ , is equal to  
556 Shannon’s surprise, so it expresses how much cue  $i$  disagrees with overall  
557 information in all previous cues, and hence it could be viewed as a measure of  
558 global conflict. Therefore, by investigating the correlation between the normalization  
559 term  $\ln P(\text{cue } i)$  and LFP activity we can test two separate hypotheses: a  
560 computational model (Bogacz et al., 2007) predicts a positive correlation, while a  
561 hypothesis that STN responds to global conflict predicts a negative correlation. We  
562 tested if the normalization term affects power of beta oscillations in the STN and did  
563 not find evidence supporting any of these two hypotheses in our data.

564 It has been previously reported that the Bayesian normalization term was encoded in  
565 the power of beta oscillations in the cortex in a decision task in which the evidence  
566 was also presented gradually (Gould et al., 2012). Consequently, we explored whether  
567 there was any coding of the Bayesian normalization term in the cortex in controls, by

568 running a regression across all times, frequencies and channels, with cue identity  
569 ('same' or 'different') as a control variable. We found a significant effect in the beta  
570 band towards the end of the cue period (Figure 5B), matching in timing and frequency  
571 to those reported by Gould et al. (2012).

572 We also explored whether there was a signal reflecting the magnitude of accumulated  
573 evidence in the STN and cortex, but we did not find such a signal (STN: Figure 5A,  
574 cortex: not shown). Finally, given previous reports of decreasing beta power as a result  
575 of increasing working memory load (Zavala et al., 2017), we also ran a regression on  
576 beta power including the serial position at each cue stimulus, and found no significant  
577 effects (see Figure 5A, 'stimulus number'). Instead as can be seen in Figure 5A, beta  
578 power carried information about the similarity of the stimulus to the previous one  
579 ('same' or 'different'), but no signal pertaining to of any form of evidence accumulation.  
580 There were no significant effects of any of the above regressors on theta power.

581

582

583

584

585

586

587

588

589

590

591

592

593

594

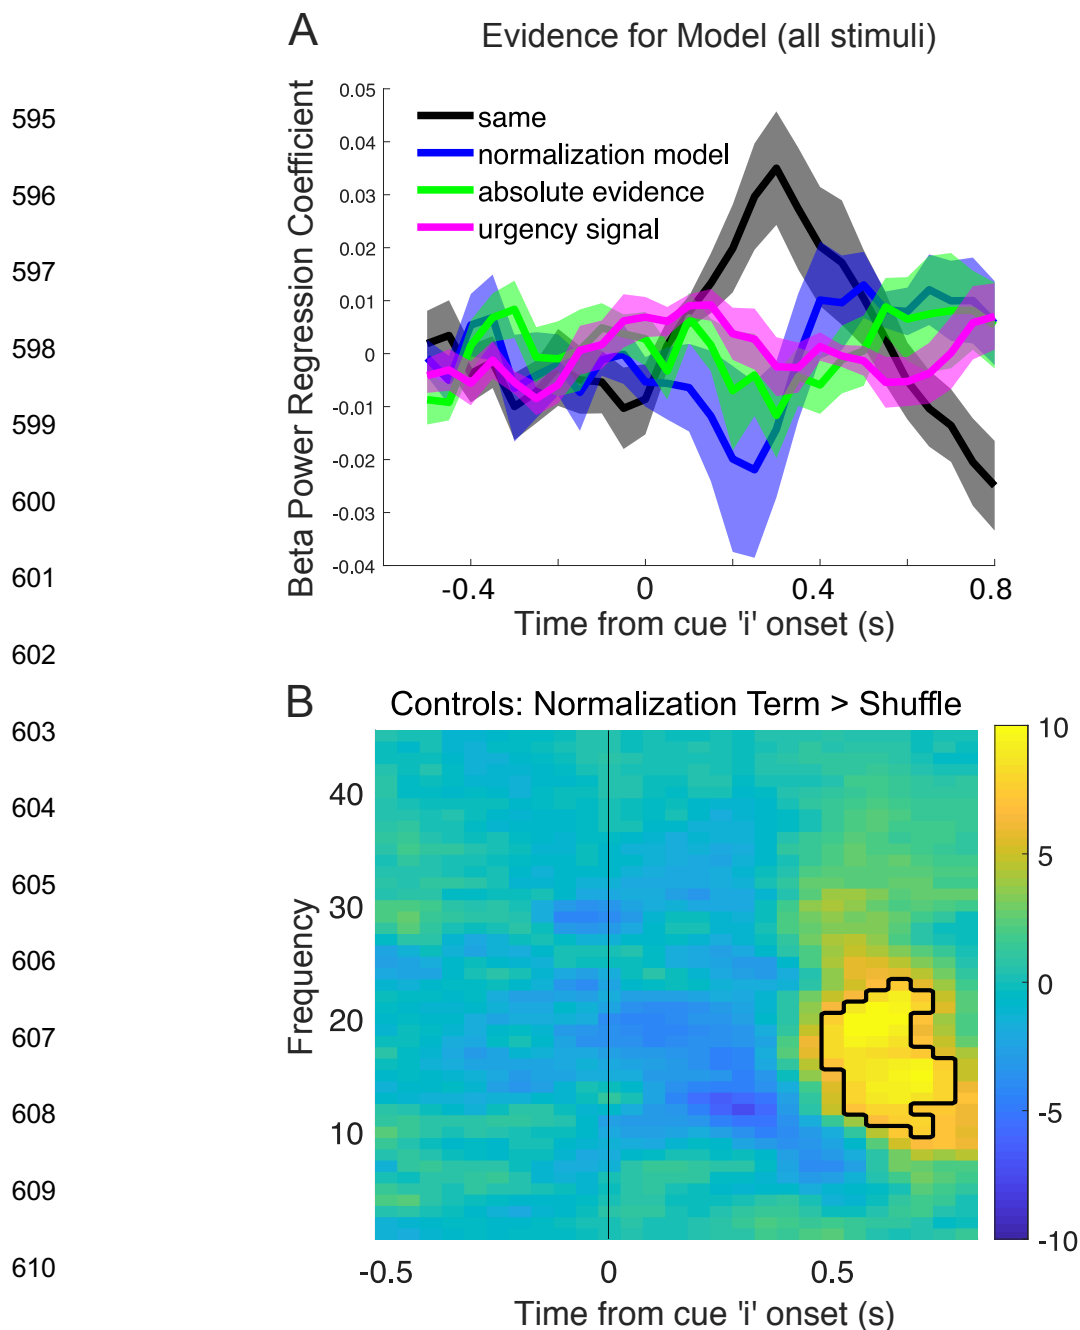

613 **Figure 5: STN activity encodes local conflict via beta oscillations, but does not**  
614 **code variables related to accumulation of evidence. A)** A linear regression of beta  
615 and theta in the STN revealed that the only clear signal was related to the identity of  
616 the cue ('same' or 'different', shaded in grey) in beta power only, and there was no  
617 encoding of Bayesian normalization, as proposed previously (Bogacz et al., 2007,  
618 2016), nor was there encoding of integrated evidence, or stimulus number in the  
619 sequence of cues in a trial. **B)** We found evidence for the Bayesian normalization term  
620 in controls at the sensor level (500-750ms, 10-23Hz,  $P < 0.001$ , Cohen's  $d = 1.98$ ).

## 621 **Discussion**

622 In this experiment we present novel evidence pertaining to the role of the STN and  
623 cortico-subthalamic communication during sequential decision making, using a task  
624 in which participants had to integrate evidence over discrete time periods, with no  
625 constraints on how many samples they could observe before making a decision. We  
626 find evidence for persistent local conflict representation in the STN via beta  
627 oscillations, and increased coherence with frontal cortex.

628

### 629 *Representation of Conflict in the STN*

630 We found that activity in the beta band carried information about local conflict, i.e. a  
631 difference between the current cue and the preceding one, but not about global  
632 conflict i.e. a surprise by the current cue given all previous cues. Although we  
633 established that beta power varies depending on whether the current cue differs from  
634 a previous one in a sequence – an event to which we refer as a local conflict – it is  
635 less clear from our data what the function of this activity is, and what fundamental  
636 variable it encodes.

637 It is possible that the observed changes in beta power are connected with motor  
638 inhibition. Beta power was initially lower for cues that were ‘different’ to the one  
639 immediately before and continued to increase across the next cue in the sequence.  
640 Activity in the beta band has been shown to carry conflict information across trials  
641 (Zavala et al., 2018), but we also show this effect within a trial, as conflict arises  
642 within the sequence of evidence. Hence, one can interpret the increase of beta power  
643 as a stop signal, or a break on motor output (Alegre et al., 2013) inhibiting a response  
644 after an inconsistent cue. Moreover, the majority of trials ended on a ‘same’ cue  
645 (Table 1), which is in line with an overall increase in beta synchronization after  
646 ‘different’ cues and lower probability of responding.

647 The response to different cues could also be interpreted as encoding of expectancy  
648 valuation, uncertainty or surprise. Beta power increases have been reported when a  
649 ‘surprise’ stimulus is presented (Wessel et al., 2016), and STN activity measured with  
650 fMRI has been shown to increase when there is increased uncertainty which option  
651 is correct arising due to too much choice (Keuken et al., 2015). Although, in our study  
652 we found no evidence that the STN encodes the Shannon’s surprise term.

653

654 *Interaction between STN and Cortex*

655 Interestingly, the ‘same’-‘different’ effect on average peaked earlier in the cortex, and  
656 also did not carry over to the next cue in the sequence (Figure 3A). A possible  
657 interpretation is that the cortex signalled the immediate local conflict to STN,  
658 dovetailing with recent evidence suggesting the cortical conflict signal precedes the  
659 STN (Chen et al., 2020), which then maintained a more persistent activity to inhibit  
660 responses (Brittain et al., 2012; Fife et al., 2017).

661 When we localized the sources of the ‘same’-‘different’ effect, we found the local  
662 conflict signal in widespread areas of the cortex. Only one frontal source, located in  
663 dorsal premotor cortex/supplementary motor area (dPM/BA6) showed a significant  
664 coherence modulation with the ipsilateral STN only, namely an increase in alpha/low-  
665 beta coherence shortly after the offset of a ‘different’, or conflict, cue, and an increase  
666 in beta coherence that carried over to the next cue in the sequence (Figure 4). The  
667 right BA6, specifically dorsal BA6 (Mattia et al., 2012; Mirabella, 2014), is well-  
668 established as a cortical region involved in response-inhibition/initiation and  
669 cognitive control (Chambers et al., 2007; Simmonds et al., 2008; Aron, 2011).

670 While it is well-established that the cortex communicates with the STN via two  
671 anatomically defined pathways, the indirect and the hyperdirect pathways (Albin et  
672 al., 1989; DeLong, 1990; Nambu et al., 2002), recent evidence suggests the  
673 existence of two separate coherent beta oscillatory networks between the cortex and  
674 the STN (Oswal et al., 2016a). Here we find evidence for two different bands of  
675 oscillatory connectivity between the STN and dorsal premotor cortex, which may  
676 have implications for understanding the involvement of various pathways in  
677 sequential evidence accumulation. Interestingly, a recent study showed evidence of  
678 a hyperdirect pathway from inferior frontal gyrus (IFG) to the STN operating in the  
679 13-30Hz range (Chen et al., 2020), which points to a more ventral portion of the  
680 frontal cortex than presented here. In fact, many studies in stop-signal/go-nogo tasks  
681 point to the IFG (Aron et al., 2014), however in these tasks conflict is not part of an  
682 evidence accumulation process, hence we may expect differences depending on the  
683 type of decision being made, (Erika-Florence et al., 2014; Hampshire, 2015; Mosley  
684 et al., 2020).

685 Due to the evoked-activity as a result of the ongoing cue presentation, we were  
686 unable to reliably estimate the directionality of coherence, but previous reports on

687 resting-state data have shown cortex to drive STN activity (Litvak et al., 2011a),  
688 which is in line with the finding here that the ‘same’-‘different’ effect seems to peak  
689 earlier in the cortical signal. However, recent data has also suggested that during  
690 processing of incongruent stimuli, STN to primary motor effective connectivity is  
691 increased in the beta band (Wessel et al., 2019), suggesting that the directionality of  
692 communication may be different across task and non-task contexts.

693

#### 694 *Where is the theta conflict signal?*

695 The predominant theory of STN function, and also that of the cortex during conflict  
696 detection, is the involvement of theta oscillations (Cavanagh and Frank, 2014). A large  
697 portion of empirical findings on the STN shows that it carries conflict information via  
698 the theta band (Cavanagh et al., 2011; Bastin et al., 2014; Zavala et al., 2015, 2016,  
699 2017, 2018; Herz et al., 2016). Yet in our task we only found a weak effect of theta  
700 modulation, in the cue following a local conflict (cue i+1). This effect was present only  
701 in the STN, and no theta effects were found in the cortex. Moreover, this manifested  
702 as reduced theta synchronization to ‘different’ cues, which is the opposite of the  
703 standard reported theta increase during conflict. One explanation may be the task  
704 design, as it differs from previous paradigms: there are no long intervals over which to  
705 examine slow oscillations, such as theta. Our results, therefore, though focussed on  
706 theta power, may be dominated by evoked potentials, as cues were presented in a  
707 fixed, relatively short duration sequence. Additionally, here conflict is defined over the  
708 course of multiple cues, not on a singular trial in isolation. Thus, the integration of  
709 conflict over time may in fact be driven by different signals – beta may represent a  
710 more consistent inhibition. Nevertheless, others have also reported a lack of theta  
711 effects in the STN during a stop-signal task (Bastin et al., 2014).

#### 712 *Updating models of the STN*

713 .An influential model of the role of the STN in decision making proposed by Frank  
714 (2006) suggests that in situations of conflict between competing responses an  
715 increased activity of STN postpones action initiation (Frank, 2006). This model  
716 proposes that STN is essential for decision making since it ensures that an action is  
717 only selected when it has high evidence, relative to the other options. Another model  
718 proposed by Bogacz & Gurney (2007) suggests that the basal ganglia compute the



719 reward probabilities for selecting different actions according to Bayesian decision  
720 theory (Bogacz et al., 2007; Bogacz and Larsen, 2011). While in our task we did not  
721 find conclusive evidence that the STN is encoding Bayesian normalization (Figure 5A),  
722 we observed its participation in conflict processing. It is important to remember that,  
723 despite being on medication, these experiments were performed in patients whose  
724 neural circuitry has been affected by advanced Parkinson's disease. Control  
725 participants did show activity encoding Bayesian normalization at the cortical level  
726 (Figure 5B), in remarkable agreement with a previous study (Gould et al., 2012), cf.  
727 their Figure 8. Thus, one cannot rule out the possibility that the Bayesian normalization  
728 is encoded by the STN of healthy individuals, but testing this hypothesis would require  
729 a different experimental technique (e.g. recording of STN neural activity from animals  
730 during an analogous decision making task, such as in Brunton, Botvinick, & Brody,  
731 2013). Evidence also suggests that subdivisions within the STN may be responsible  
732 for different types of inhibition, with prepotent response inhibition to cues (go-no-go  
733 task) being more dependent on the ventral portion of the STN (Hershey et al., 2010).  
734 Given that the majority of our recording sites were well within the dorsal ('motor') region  
735 of the STN, we cannot rule out the contribution of more ventral sites to these  
736 computations.

737 We conclude that contrary to the emphasis on theta signals in the context of immediate  
738 conflict, here we find a prominent role for beta oscillations in signalling local conflict in  
739 a sequence of evidence. We find that both frontal cortex and the STN carry this signal,  
740 and show increased coherence in the beta band that carries over to the next cue in  
741 the sequence. Thus, we show increased communication in these areas may reduce  
742 the probability of responding in the face of incoming conflicting information.

743

#### 744 **Data availability**

745 The full MEG dataset for controls is available in BIDS format on  
746 <https://openneuro.org/datasets/ds002908> and LFP and source data for patients is  
747 available on [https://data.mrc.ox.ac.uk/data-set/human-lfp-recordings-stn-during-](https://data.mrc.ox.ac.uk/data-set/human-lfp-recordings-stn-during-sequential-conflict-task)  
748 [sequential-conflict-task](https://data.mrc.ox.ac.uk/data-set/human-lfp-recordings-stn-during-sequential-conflict-task). Code and analysis pipeline at  
749 [https://github.com/zits69/MOUSE\\_LFPMEG](https://github.com/zits69/MOUSE_LFPMEG).

#### 750 **Acknowledgements & Funding**

751 This work has been supported by MRC grants MC\_UU\_12024/5, MC\_UU\_00003/1  
752 and BBSRC grant BB/S006338/1. The Wellcome Centre for Human Neuroimaging is  
753 supported by core funding from the Wellcome (203147/Z/16/Z). UK MEG community  
754 is supported by UK MEG Partnership award from the Medical Research Council  
755 (MR/K005464/1). We thank Dr. Ashwini Oswal, Dr. Simon Little, Dr. David Pedrosa,  
756 Dr. Damian Herz and Dr. Viswas Dayal for clinical support of patient recordings. We  
757 are also grateful to Dr. Tim West, Dr. Hayriye Cagnan and Dr. Simon Farmer for  
758 commenting on the manuscript.

759 **Competing interests** None.

760  
761  
762  
763  
764  
765  
766  
767  
768  
769  
770  
771  
772  
773  
774  
775  
776  
777  
778  
779  
780  
781  
782  
783

784 **REFERENCES**

- 785 Albin RL, Young AB, Penney JB (1989) The functional anatomy of basal ganglia  
786 disorders. *Trends Neurosci* 12:366–375 Available at:  
787 <http://www.sciencedirect.com/science/article/pii/016622368990074X>.
- 788 Alegre M, Lopez-Azcarate J, Obeso I, Wilkinson L, Rodriguez-Oroz MC, Valencia M,  
789 Garcia-Garcia D, Guridi J, Artieda J, Jahanshahi M, Obeso JA (2013) The  
790 subthalamic nucleus is involved in successful inhibition in the stop-signal task: A  
791 local field potential study in Parkinson’s disease. *Exp Neurol* 239:1–12 Available  
792 at: <http://dx.doi.org/10.1016/j.expneurol.2012.08.027>.
- 793 Aron AR (2011) From reactive to proactive and selective control: Developing a richer  
794 model for stopping inappropriate responses. *Biol Psychiatry* 69:e55–e68  
795 Available at: <http://dx.doi.org/10.1016/j.biopsych.2010.07.024>.
- 796 Aron AR, Robbins TW, Poldrack RA (2014) Right inferior frontal cortex: Addressing  
797 the rebuttals. *Front Hum Neurosci* 8:8–11.
- 798 Ashburner J, Friston KJ (2005) Unified segmentation. *Neuroimage* 26:839–851  
799 Available at: <http://www.ncbi.nlm.nih.gov/pubmed/15955494> [Accessed June 11,  
800 2011].
- 801 Bastin J, Polosan M, Benis D, Goetz L, Bhattacharjee M, Piallat B, Krainik A,  
802 Bougerol T, Chabardès S, David O (2014) Inhibitory control and error monitoring  
803 by human subthalamic neurons. *Transl Psychiatry* 4:2–9.
- 804 Bejjani B-P, Dormont D, Pidoux B, Yelnik J, Damier P, Arnulf I, Bonnet A-M,  
805 Marsault C, Agid Y, Philippon J, Cornu P (2000) Bilateral subthalamic  
806 stimulation for Parkinson’s disease by using three-dimensional stereotactic  
807 magnetic resonance imaging and electrophysiological guidance. *J Neurosurg*  
808 92:615–625 Available at: [https://thejns.org/view/journals/j-neurosurg/92/4/article-](https://thejns.org/view/journals/j-neurosurg/92/4/article-p615.xml)  
809 [p615.xml](https://thejns.org/view/journals/j-neurosurg/92/4/article-p615.xml).
- 810 Benis D, David O, Lachaux JP, Seigneuret E, Krack P, Fraix V, Chabardès S, Bastin  
811 J (2014) Subthalamic nucleus activity dissociates proactive and reactive  
812 inhibition in patients with Parkinson’s disease. *Neuroimage* 91:273–281  
813 Available at: <http://dx.doi.org/10.1016/j.neuroimage.2013.10.070>.

- 814 Bogacz R, Gurney K, Larsen T, Gurney K (2007) The basal ganglia and cortex  
815 implement optimal decision. *Neural Comput* 19:442–477.
- 816 Bogacz R, Larsen T (2011) Integration of reinforcement learning and optimal  
817 decision-making theories of the basal ganglia. *Neural Comput* 23:817–851.
- 818 Bogacz R, Martin Moraud E, Abdi A, Magill PJ, Baufreton J (2016) Properties of  
819 Neurons in External Globus Pallidus Can Support Optimal Action Selection.  
820 *PLoS Comput Biol* 12:1–28.
- 821 Bogacz R, Wagenmakers E-JJ, Forstmann BU, Nieuwenhuis S (2010) The neural  
822 basis of the speed-accuracy tradeoff. *Trends Neurosci* 33:10–16 Available at:  
823 <http://www.ncbi.nlm.nih.gov/pubmed/19819033>.
- 824 Bonnevie T, Zaghloul KA (2019) The Subthalamic Nucleus: Unravelling New Roles  
825 and Mechanisms in the Control of Action. *Neuroscientist* 25:48–64.
- 826 Brittain J-S, Watkins KE, Joundi RA, Ray NJ, Holland P, Green AL, Aziz TZ,  
827 Jenkinson N (2012) A role for the subthalamic nucleus in response inhibition  
828 during conflict. *J Neurosci* 32:13396–13401.
- 829 Brunton BW, Botvinick MM, Brody CD (2013) Rats and Humans Can Optimally  
830 Accumulate Evidence for Decision-Making. *Science* (80- ) 340:95–99.
- 831 Busemeyer JR, Townsend JT (1993) Decision field theory: A dynamic-cognitive  
832 approach to decision making in an uncertain environment. *Psychol Rev*  
833 100:432–459.
- 834 Cavanagh JF, Frank MJ (2014) Frontal theta as a mechanism for cognitive control.  
835 *Trends Cogn Sci* 18:414–421 Available at:  
836 <http://dx.doi.org/10.1016/j.tics.2014.04.012>.
- 837 Cavanagh JF, Wiecki T V., Cohen MX, Figueroa CM, Samanta J, Sherman SJ,  
838 Frank MJ (2011) Subthalamic nucleus stimulation reverses mediofrontal  
839 influence over decision threshold. *Nat Neurosci* 14:1462–1467 Available at:  
840 <http://dx.doi.org/10.1038/nn.2925>.
- 841 Chambers CD, Bellgrove MA, Gould IC, English T, Garavan H, McNaught E, Kamke  
842 M, Mattingley JB (2007) Dissociable mechanisms of cognitive control in  
843 prefrontal and premotor cortex. *J Neurophysiol* 98:3638–3647.

- 844 Chen W, de Hemptinne C, Miller AM, Leibbrand M, Little SJ, Lim DA, Larson PS,  
845 Starr PA (2020) Prefrontal-Subthalamic Hyperdirect Pathway Modulates  
846 Movement Inhibition in Humans. *Neuron* 106:579-588.e3 Available at:  
847 <https://doi.org/10.1016/j.neuron.2020.02.012>.
- 848 Coulthard EJ, Bogacz R, Javed S, Mooney LK, Murphy G, Keeley S, Whone AL  
849 (2012) Distinct roles of dopamine and subthalamic nucleus in learning and  
850 probabilistic decision making. *Brain* 135:3721–3734.
- 851 DeLong MR (1990) Primate models of movement disorders of basal ganglia origin.  
852 *Trends Neurosci* 13:281–285.
- 853 Erika-Florence M, Leech R, Hampshire A (2014) A functional network perspective on  
854 response inhibition and attentional control. *Nat Commun* 5:1–12 Available at:  
855 <http://dx.doi.org/10.1038/ncomms5073>.
- 856 Fife KH, Gutierrez-Reed NA, Zell V, Bailly J, Lewis CM, Aron AR, Hnasko TS (2017)  
857 Causal role for the subthalamic nucleus in interrupting behavior. *Elife* 6:1–13.
- 858 Foltynie T, Zrinzo L, Martinez-Torres I, Tripoliti E, Petersen E, Holl E, Aviles-Olmos I,  
859 Jahanshahi M, Hariz M, Limousin P (2011) MRI-guided STN DBS in Parkinson's  
860 disease without microelectrode recording: Efficacy and safety. *J Neurol*  
861 *Neurosurg Psychiatry* 82:358–363.
- 862 Frank LM, Samanta J, Moustafa AA, Sherman SJ (2007) Hold your horses:  
863 Impulsivity, deep brain stimulation, and medication in Parkinsonism. *Science*  
864 (80- ) 318:1309–1312 Available at:  
865 <http://www.ncbi.nlm.nih.gov/pubmed/17962524>.
- 866 Frank MJ (2006) Hold your horses: A dynamic computational role for the subthalamic  
867 nucleus in decision making. *Neural Networks* 19:1120–1136.
- 868 Friston KJ (Karl J., Ashburner J, Kiebel S, Nichols T, Penny WD (2007) Statistical  
869 parametric mapping : the analysis of funtional brain images. Elsevier/Academic  
870 Press.
- 871 Gould IC, Nobre AC, Wyart V, Rushworth MFS (2012) Effects of decision variables  
872 and intraparietal stimulation on sensorimotor oscillatory activity in the human  
873 brain. *J Neurosci* 32:13805–13818.

- 874 Green N, Bogacz R, Huebl J, Beyer AK, Kühn AA, Heekeren HR (2013) Reduction of  
875 influence of task difficulty on perceptual decision making by stn deep brain  
876 stimulation. *Curr Biol* 23:1681–1684.
- 877 Gross J, Baillet S, Barnes GR, Henson RN, Hillebrand A, Jensen O, Jerbi K, Litvak  
878 V, Maess B, Oostenveld R, Parkkonen L, Taylor JR, van Wassenhove V, Wibral  
879 M, Schoffelen J-M (2012) Good practice for conducting and reporting MEG  
880 research. *Neuroimage* 65C:349–363 Available at:  
881 <http://www.ncbi.nlm.nih.gov/pubmed/23046981>.
- 882 Hampshire A (2015) Putting the brakes on inhibitory models of frontal lobe function.  
883 *Neuroimage* 113:340–355 Available at:  
884 <http://dx.doi.org/10.1016/j.neuroimage.2015.03.053>.
- 885 Hershey T, Campbell MC, Videen TO, Lugar HM, Weaver PM, Hartlein J, Karimi M,  
886 Tabbal SD, Perlmutter JS (2010) Mapping Go-No-Go performance within the  
887 subthalamic nucleus region. *Brain* 133:3625–3634.
- 888 Herz DM, Little S, Pedrosa DJ, Tinkhauser G, Cheeran B, Foltynie T, Bogacz R,  
889 Brown P (2018) Mechanisms Underlying Decision-Making as Revealed by  
890 Deep-Brain Stimulation in Patients with Parkinson’s Disease. *Curr Biol* 28:1169-  
891 1178.e6 Available at: <https://doi.org/10.1016/j.cub.2018.02.057>.
- 892 Herz DM, Zavala B, Bogacz R, Brown P (2016) Neural Correlates of Decision  
893 Thresholds in the Human Subthalamic Nucleus. *Curr Biol* 26:916–920 Available  
894 at: <http://dx.doi.org/10.1016/j.cub.2016.01.051>.
- 895 Holl EM, Petersen EA, Foltynie T, Martinez-Torres I, Limousin P, Hariz MI, Zrinzo L  
896 (2010) Improving Targeting in Image-Guided Frame-Based Deep Brain  
897 Stimulation. *Oper Neurosurg* 67:ons437–ons447 Available at:  
898 <https://doi.org/10.1227/NEU.0b013e3181f7422a>.
- 899 Horn A, Kühn AA (2015) Lead-DBS: a toolbox for deep brain stimulation electrode  
900 localizations and visualizations. *Neuroimage* 107:127–135.
- 901 Jahanshahi M (2013) Effects of deep brain stimulation of the subthalamic nucleus on  
902 inhibitory and executive control over prepotent responses in Parkinson’s  
903 disease. *Front Syst Neurosci* 7:118.

- 904 Keuken MC, Van Maanen L, Bogacz R, Schäfer A, Neumann J, Turner R,  
905 Forstmann BU (2015) The subthalamic nucleus during decision-making with  
906 multiple alternatives. *Hum Brain Mapp* 36:4041–4052.
- 907 Kriegeskorte N, Simmons WK, Bellgowan PS, Baker CI (2009) Circular analysis in  
908 systems neuroscience: The dangers of double dipping. *Nat Neurosci* 12:535–  
909 540.
- 910 Leimbach F, Georgiev D, Litvak V, Antoniadou C, Limousin P, Jahanshahi M,  
911 Bogacz R (2018) Deep brain stimulation of the subthalamic nucleus does not  
912 affect the decrease of decision threshold during the choice process when there  
913 is no conflict, time pressure, or reward. *J Cogn Neurosci* 30:876–884 Available  
914 at: [https://doi.org/10.1162/jocn\\_a\\_01252](https://doi.org/10.1162/jocn_a_01252).
- 915 Litvak V, Eusebio A, Jha A, Oostenveld R, Barnes G, Foltynie T, Limousin P, Zrinzo  
916 L, Hariz MI, Friston K, Brown P (2012) Movement-Related Changes in Local and  
917 Long-Range Synchronization in Parkinson’s Disease Revealed by Simultaneous  
918 Magnetoencephalography and Intracranial Recordings. *J Neurosci* 32:10541–  
919 10553.
- 920 Litvak V, Eusebio A, Jha A, Oostenveld R, Barnes GR, Penny WD, Zrinzo L, Hariz  
921 MI, Limousin P, Friston KJ, Brown P (2010) Optimized beamforming for  
922 simultaneous MEG and intracranial local field potential recordings in deep brain  
923 stimulation patients. *Neuroimage* 50:1578–1588 Available at:  
924 <http://dx.doi.org/10.1016/j.neuroimage.2009.12.115>.
- 925 Litvak V, Jha A, Eusebio A, Oostenveld R, Foltynie T, Limousin P, Zrinzo L, Hariz MI,  
926 Friston K, Brown P (2011a) Resting oscillatory cortico-subthalamic connectivity  
927 in patients with Parkinson’s disease. *Brain* 134:359–374.
- 928 Litvak V, Mattout J, Kiebel S, Phillips C, Henson R, Kilner J, Barnes G, Oostenveld  
929 R, Daunizeau J, Flandin G, Penny WD, Friston KJ (2011b) EEG and MEG data  
930 analysis in SPM8. Baillet S, ed. *Comput Intell Neurosci* 2011:852961 Available  
931 at: <https://doi.org/10.1155/2011/852961> [Accessed July 7, 2011].
- 932 Magill PJ, Sharott A, Bolam JP, Brown P (2004) Brain state-dependency of coherent  
933 oscillatory activity in the cerebral cortex and basal ganglia of the rat. *J*  
934 *Neurophysiol* 92:2122–2136.

- 935 Mattia M, Spadacenta S, Pavone L, Quarato P, Esposito V, Sparano A, Sebastiano  
936 F, Di Gennaro G, Morace R, Cantore G, Mirabella G (2012) Stop-event-related  
937 potentials from intracranial electrodes reveal a key role of premotor and motor  
938 cortices in stopping ongoing movements. *Front Neuroeng* 5:1–13.
- 939 Mattout J, Henson RN, Friston KJ (2007) Canonical Source Reconstruction for MEG  
940 Sanei S, ed. *Comput Intell Neurosci* 2007:67613 Available at:  
941 <https://doi.org/10.1155/2007/67613>.
- 942 Mirabella G (2014) Should I stay or should I go? Conceptual underpinnings of goal-  
943 directed actions. *Front Syst Neurosci* 8:1–21.
- 944 Mosley PE, Paliwal S, Robinson K, Coyne T, Silburn P, Tittgemeyer M, Stephan KE,  
945 Perry A, Breakspear M (2020) The structural connectivity of subthalamic deep  
946 brain stimulation correlates with impulsivity in Parkinson’s disease. *Brain*  
947 143:2235–2254.
- 948 Nambu A, Tokuno H, Takada M (2002) Functional significance of the cortico-  
949 subthalamo-pallidal “hyperdirect” pathway. *Neurosci Res* 43:111–117.
- 950 Oostenveld R, Fries P, Maris E, Schoffelen J-MM (2011) FieldTrip: Open source  
951 software for advanced analysis of MEG, EEG, and invasive electrophysiological  
952 data. *Comput Intell Neurosci* 2011:156869 Available at:  
953 [http://www.pubmedcentral.nih.gov/articlerender.fcgi?artid=3021840&tool=pmcen](http://www.pubmedcentral.nih.gov/articlerender.fcgi?artid=3021840&tool=pmcentrez&rendertype=abstract)  
954 [trez&rendertype=abstract](http://www.pubmedcentral.nih.gov/articlerender.fcgi?artid=3021840&tool=pmcentrez&rendertype=abstract) [Accessed March 9, 2012].
- 955 Oswal A, Beudel M, Zrinzo L, Limousin P, Hariz M, Foltynie T, Litvak V, Brown P  
956 (2016a) Deep brain stimulation modulates synchrony within spatially and  
957 spectrally distinct resting state networks in Parkinson’s disease. *Brain*  
958 139:1482–1496.
- 959 Oswal A, Jha A, Neal S, Reid A, Bradbury D, Aston P, Limousin P, Foltynie T, Zrinzo  
960 L, Brown P, Litvak V (2016b) Analysis of simultaneous MEG and intracranial  
961 LFP recordings during Deep Brain Stimulation: A protocol and experimental  
962 validation. *J Neurosci Methods* 261:29–46 Available at:  
963 <http://dx.doi.org/10.1016/j.jneumeth.2015.11.029>.
- 964 Ratcliff R (1978) A theory of memory retrieval. *Psychol Rev* 85:59–108.



- 965 Ray NJ, Brittain J-S, Holland P, Joundi RA, Stein JF, Aziz TZ, Jenkinson N (2012)  
966 The role of the subthalamic nucleus in response inhibition: Evidence from local  
967 field potential recordings in the human subthalamic nucleus. *Neuroimage*  
968 60:271–278 Available at: <http://dx.doi.org/10.1016/j.neuroimage.2011.12.035>.
- 969 Simmonds DJ, Pekar JJ, Mostofsky SH (2008) Meta-analysis of Go/No-go tasks  
970 demonstrating that fMRI activation associated with response inhibition is task-  
971 dependent. *Neuropsychologia* 46:224–232.
- 972 Thomson DJ (1982) Spectrum estimation and harmonic analysis. *Proc IEEE*  
973 70:1055–1096.
- 974 Usher M, McClelland JL (2001) The time course of perceptual choice: The leaky,  
975 competing accumulator model. *Psychol Rev* 108:550–592.
- 976 Veen BD Van, Drongelen W Van, Yuchtman M, Suzuki A (1997) Localization of brain  
977 electrical activity via linearly constrained minimum variance spatial filtering.  
978 *IEEE Trans Biomed Eng* 44:867–880.
- 979 Wessel JR, Jenkinson N, Brittain J-S, Voets S, Aziz TZ, Aron AR (2016)  
980 Surprise disrupts cognition via a fronto-basal ganglia suppressive mechanism.  
981 *Nat Commun* 7.
- 982 Wessel JR, Waller DA, Greenlee JD (2019) Non-selective inhibition of inappropriate  
983 motor-tendencies during response-conflict by a fronto-subthalamic mechanism.  
984 *Elife* 8:1–26.
- 985 West TO, Berthouze L, Halliday DM, Litvak V, Sharott A, Magill PJ, Farmer SF  
986 (2018) Propagation of beta/gamma rhythms in the cortico-basal ganglia circuits  
987 of the parkinsonian rat. *J Neurophysiol* 119:1608–1628.
- 988 West TO, Farmer SF, Magill PJ, Sharott A, Litvak V, Cagnan H (2020) State  
989 Dependency of Beta Oscillations in the Cortico-Basal-Ganglia Circuit and their  
990 Neuromodulation under Phase Locked Inputs. :1–42.
- 991 Zavala B, Damera S, Dong JW, Lungu C, Brown P, Zaghoul KA (2015) Human  
992 subthalamic nucleus theta and beta oscillations entrain neuronal firing during  
993 sensorimotor conflict. *Cereb Cortex* 27:496–508.
- 994 Zavala B, Jang A, Trotta M, Lungu CI, Brown P, Zaghoul KA (2018) Cognitive

995 control involves theta power within trials and beta power across trials in the  
996 prefrontal-subthalamic network. *Brain* 141:3361–3376.

997 Zavala B, Jang AI, Zaghloul KA (2017) Human subthalamic nucleus activity during  
998 non-motor decision making. *Elife* 6:1–23.

999 Zavala B, Tan H, Ashkan K, Foltynie T, Limousin P, Zrinzo L, Zaghloul K, Brown P  
1000 (2016) Human subthalamic nucleus-medial frontal cortex theta phase coherence  
1001 is involved in conflict and error related cortical monitoring. *Neuroimage*  
1002 137:178–187 Available at: <http://dx.doi.org/10.1016/j.neuroimage.2016.05.031>.

1003 Zavala B, Tan H, Little S, Ashkan K, Hariz M, Foltynie T, Zrinzo L, Zaghloul KA,  
1004 Brown P (2014) Midline frontal cortex low-frequency activity drives subthalamic  
1005 nucleus oscillations during conflict. *J Neurosci* 34:7322–7333.

1006
